# Supplementary material for: A Multi-Technique Approach to Evaluate the Surface Properties of Heat-Treated Chestnut Wood Finished with a Water-Based Coating
Source: MDPI journal article supplement (doi:10.3390/coatings11060706), 2021-06-11
Supplement: s1 [file s1]

# Supplementary Materials: A Multi-technique Approach to Evaluate the Surface Properties of Heat-treated Chestnut Wood Finished with a Water-based Coating

Claudia Pelosi <sup>1</sup>, Gianluca Rubino <sup>1</sup>, Giuseppe Capobianco <sup>2</sup>, Luca Lanteri <sup>1</sup>, Giorgia Agresti <sup>1</sup>, Giuseppe Bonifazi <sup>2</sup>, Silvia Serranti <sup>2</sup>, Rodolfo Picchio <sup>3</sup> and Angela Lo Monaco <sup>3,\*</sup>

- <sup>1</sup> Laboratory of Diagnostics and Materials Science, Department of Economics, Engineering, Society and Business Organization (DEIM), University of Tuscia, Largo dell'Università, 01100 Viterbo, Italy; pelosi@unitus.it (C.P.); gianluca.rubino@unitus.it (G.R.); llanteri@unitus.it (L.L.); agresti@unitus.it (G.A.)
- <sup>2</sup> Department of Chemical Engineering Materials & Environment, Sapienza, Rome University, Via Eudossiana 18, 00184 Rome, Italy; giuseppe.capobianco@uniroma1.it (G.C.); giuseppe.bonifazi@uniroma1.it (G.B.); silvia.serranti@uniroma1.it (S.S.)
- <sup>3</sup> Department of Agriculture and Forest Sciences (DAFNE), University of Tuscia, Via S. Camillo de Lellis, 01100 Viterbo, Italy; r.picchio@unitus.it
- \* Correspondence: lomonaco@unitus.it

**Citation:** Pelosi, C.; Rubino, G.; Capobianco, G.; Lanteri, L.; Agresti, G.; Bonifazi, G.; Serranti, S.; Picchio, R.; Lo Monaco A. A Multi-Technique Approach to Evaluate the Surface Properties of Heat-treated Chestnut Wood Finished with a Water-Based Coating. *Coatings* **2021**, *11*, 706. <https://doi.org/10.3390/coatings11060706>

Academic Editors: Ruslan Rushanovich Safin and Aigul Ravilevna Shaikhutdinova

Received: 3 May 2021

Accepted: 8 June 2021

Published: 11 June 2021

**Publisher's Note:** MDPI stays neutral with regard to jurisdictional claims in published maps and institutional affiliations.

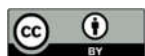

**Copyright:** © 2021 by the author. Licensee MDPI, Basel, Switzerland. This article is an open access article distributed under the terms and conditions of the Creative Commons Attribution (CC BY) license (<http://creativecommons.org/licenses/by/4.0/>).

### Hyperspectral imaging data

The score plot of the second and third principal components (PC2 and PC3), obtained by PCA (Figure S1), shows four different clouds, representative of the selected reference wood specimens (i.e. coated and uncoated untreated wood, coated and 140 °C thermally treated coated and uncoated specimens). The PC2 highlights the spectral variance between uncoated and coated specimens, while PC3 highlights the main variation between untreated and 140 °C thermal treated specimens.

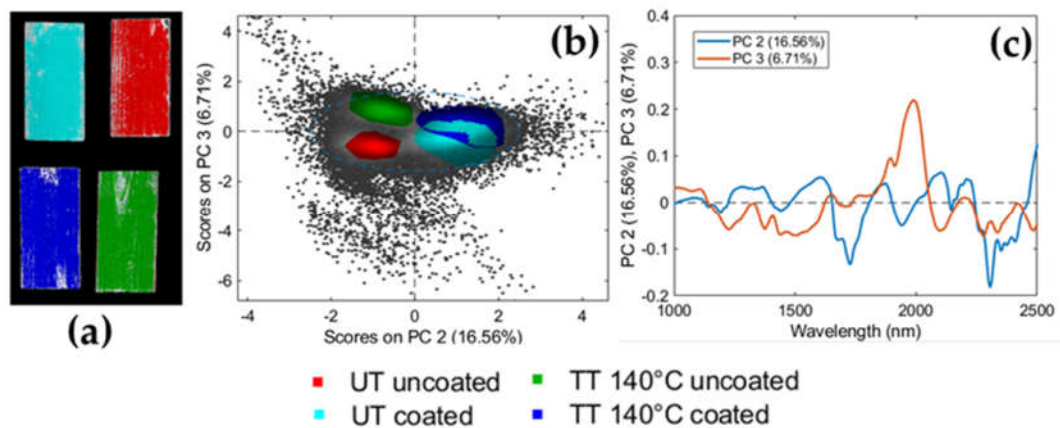

**Figure S1.** Raw hyperspectral image highlighting the classes UT and TT 140°C coated and uncoated (a), clustered in the corresponding PCA score (b) and loading (c) plots.

The score plot of PC2 and PC3, obtained by PCA (Figure S2), shows four different clouds, representative of the selected reference wood specimens (i.e. coated and uncoated untreated wood, coated and 170 °C thermally treated coated and uncoated specimens). The PC2 highlights the spectral variance between uncoated and coated specimens, while PC3 highlights the main variation between untreated and 170 °C thermal treated specimens.

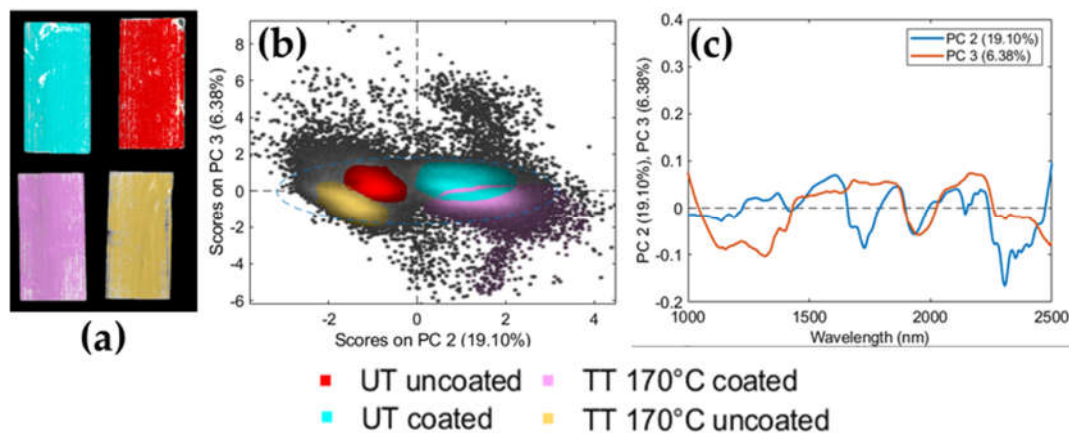

**Figure S2.** Raw hyperspectral image highlighting the classes UT and TT 170 °C coated and uncoated (a), clustered in the corresponding PCA score (b) and loading (c) plots.

The score plot of PC1 and PC2, obtained by PCA (Figure S3), shows four different clouds, representative of the selected reference wood specimens (i.e. coated and uncoated untreated wood, coated and 200 °C thermally treated coated and uncoated specimens). The PC1 highlights the variation between untreated and thermal treated at 200 °C specimens, while PC2 highlights the spectral variance between uncoated and coated

specimens. In detail, the PCA score plot highlights a distinctive separation between UT and TT 200 °C coated specimens.

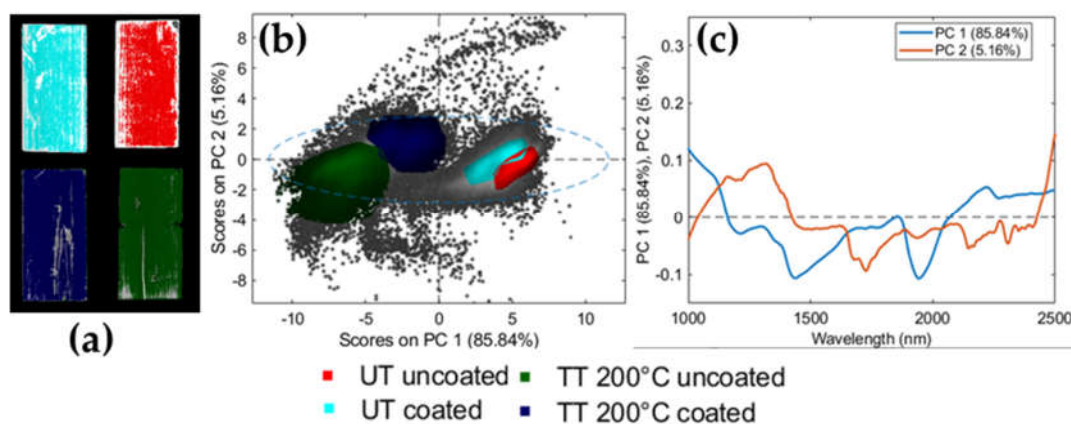

**Figure S3.** Raw hyperspectral image highlighting the classes UT and TT 200 °C coated and uncoated (a), clustered in the corresponding PCA score (b) and loading (c) plots.

**Table S1.** Sensitivity and Specificity in calibration (Cal) and cross-validation (CV) for each rule of HI-PLSDA. model.

| Rule 1             | 1     | 2     | Classification output                                                                                                                               |
|--------------------|-------|-------|-----------------------------------------------------------------------------------------------------------------------------------------------------|
| Sensitivity (Cal): | 0.998 | 0.996 | 1. TT 200 °C coated+ TT 170 °C coated+ TT 140 °C coated+ UT coated<br>2. TT 200 °C uncoated + TT 170 °C uncoated + TT 140 °C uncoated + UT uncoated |
| Specificity (Cal): | 0.996 | 0.998 |                                                                                                                                                     |
| Sensitivity (CV):  | 0.998 | 0.996 |                                                                                                                                                     |
| Specificity (CV):  | 0.996 | 0.998 |                                                                                                                                                     |
| Rule 2             | 1     | 2     | 1. TT 200 °C coated<br>2. TT 170 °C coated+ TT 140 °C coated+ UT coated                                                                             |
| Sensitivity (Cal): | 0.998 | 0.997 |                                                                                                                                                     |
| Specificity (Cal): | 0.997 | 0.998 |                                                                                                                                                     |
| Sensitivity (CV):  | 0.998 | 0.997 |                                                                                                                                                     |
| Specificity (CV):  | 0.997 | 0.998 | 1. TT 200 °C uncoated<br>2. TT 170 °C uncoated + TT 140 °C uncoated + UT uncoated                                                                   |
| Rule3              | 1     | 2     |                                                                                                                                                     |
| Sensitivity (Cal): | 0.987 | 0.999 |                                                                                                                                                     |
| Specificity (Cal): | 0.999 | 0.987 |                                                                                                                                                     |
| Sensitivity (CV):  | 0.987 | 0.999 | 1. TT 170 °C coated<br>2. TT 140 °C coated+ UT coated                                                                                               |
| Specificity (CV):  | 0.999 | 0.987 |                                                                                                                                                     |
| Rule 4             | 1     | 2     |                                                                                                                                                     |
| Sensitivity (Cal): | 0.993 | 0.993 |                                                                                                                                                     |
| Specificity (Cal): | 0.993 | 0.993 | 1. TT 170 °C uncoated<br>2. TT 140 °C uncoated from UT uncoated                                                                                     |
| Sensitivity (CV):  | 0.994 | 0.99  |                                                                                                                                                     |
| Specificity (CV):  | 0.99  | 0.994 |                                                                                                                                                     |
| Rule 5             | 1     | 2     |                                                                                                                                                     |
| Sensitivity (Cal): | 0.959 | 0.999 | 1. TT 140 °C coated<br>2. UT coated                                                                                                                 |
| Specificity (Cal): | 0.925 | 0.001 |                                                                                                                                                     |
| Sensitivity (CV):  | 0.961 | 0.974 |                                                                                                                                                     |
| Specificity (CV):  | 0.974 | 0.961 |                                                                                                                                                     |
| Rule 6             | 1     | 2     | 1. TT 170 °C uncoated<br>2. TT 140 °C uncoated                                                                                                      |
| Sensitivity (Cal): | 0.987 | 0.988 |                                                                                                                                                     |
| Specificity (Cal): | 0.988 | 0.987 |                                                                                                                                                     |
| Sensitivity (CV):  | 0.987 | 0.987 |                                                                                                                                                     |
| Specificity (CV):  | 0.987 | 0.987 | 1. TT 170 °C uncoated<br>2. TT 140 °C uncoated                                                                                                      |
| Rule 7             | 1     | 2     |                                                                                                                                                     |
| Sensitivity (Cal): | 0.993 | 0.991 |                                                                                                                                                     |
| Specificity (Cal): | 0.991 | 0.993 |                                                                                                                                                     |
| Sensitivity (CV):  | 0.993 | 0.992 |                                                                                                                                                     |
| Specificity (CV):  | 0.992 | 0.993 |                                                                                                                                                     |
